# Supplementary material for: Fluorinated anthracene derivatives as deep-blue emitters and host materials for highly efficient organic light-emitting devices
Source: Royal Society of Chemistry journal article supplement (doi:10.1039/c5ra02357b), 2015-01-01
Supplement: c5ra02357b1.pdf [file c5ra02357b1.pdf]

## Supplementary information

### Fluorinated anthracene derivatives as deep-blue emitters and host materials for highly efficient organic light-emitting devices

Lu Li, Bo Jiao\*, Yue Yu, Lin Ma, Xun Hou and Zhaoxin Wu\*

*Key Laboratory for Physical Electronics and Devices of the Ministry of Education, Xi'an Jiaotong University, Xi'an 710049, People's Republic of China*

**E-mail:** [zhaoxinwu@mail.xjtu.edu.cn](mailto:zhaoxinwu@mail.xjtu.edu.cn)

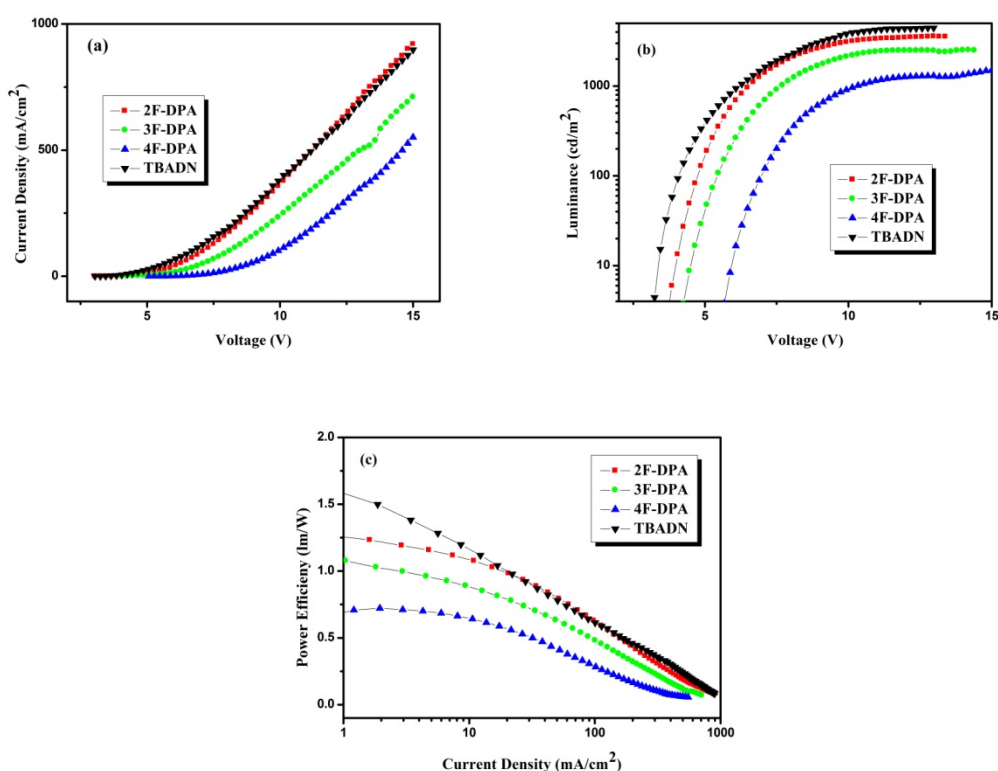

Fig. S1 Current density-voltage curve (a), Luminance-voltage curves (b) and Power efficiency-current density curves (c) for the non-doped devices with the structure of ITO/MoO<sub>3</sub>/TCTA/EML/TPBi/LiF/Al.

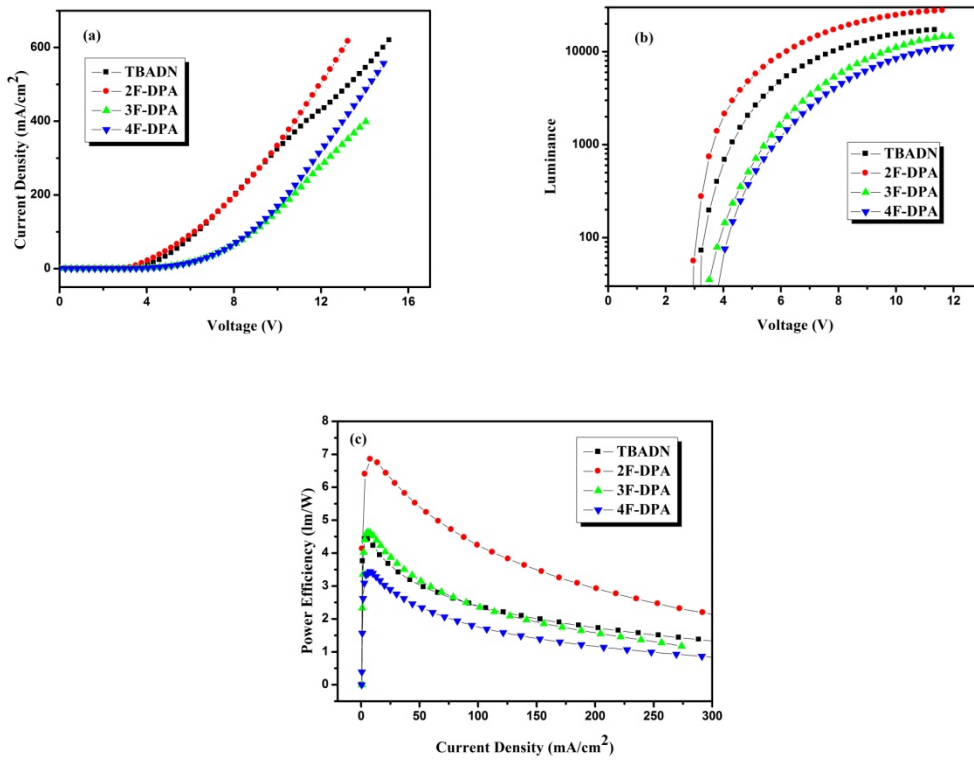

Fig. S2 Current density-voltage curve (a), Luminance-voltage curves (b) and Power efficiency-current density curves (c) for the doped devices with the structure of ITO/TAPC/Host : DPAVBi (5%)/TPBi/LiF/Al.

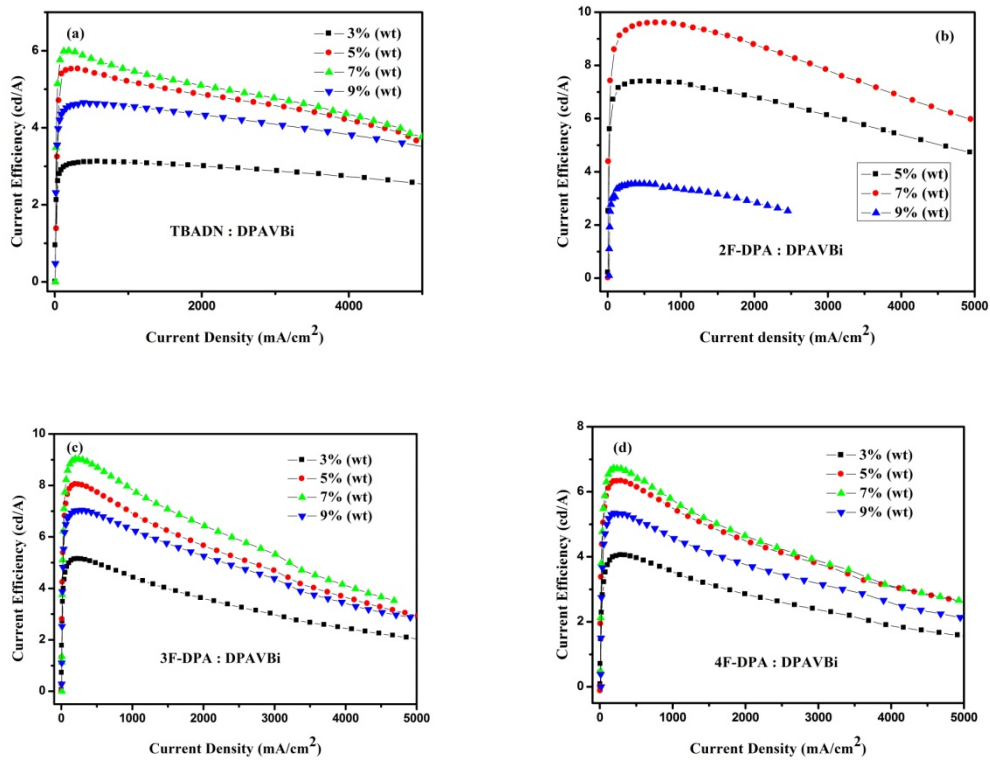

Fig S3. Current density curve for the doped devices with the different doping ratio.
